# Supplementary material for: Bis(formazanate) iron(ii) complexes as cathode materials for one-compartment H2O2 fuel cells
Source: Royal Society of Chemistry journal article supplement (doi:10.1039/d4dt03253e), 2025-01-01
Supplement: d4dt03253e1.pdf [file d4dt03253e1.pdf]

**Supporting Information**  
**Bis(formazanate) Iron(II) Complexes as Cathode Material for One-  
Compartment H<sub>2</sub>O<sub>2</sub> Fuel Cell**

*Sunita Birara*<sup>[a]</sup>, *Moumita Majumder*<sup>[b]</sup>, *Ramesh K. Metre*<sup>\*[a]</sup>

[a] Department of Chemistry, Indian Institute of Technology Jodhpur, Rajasthan- 342030, India

[b] Department of Chemistry, School of Science and Environmental Studies, Dr. Vishwanath Karad

MIT World Peace University, Pune 411038, Maharashtra, India.

**RECEIVED DATE (to be automatically inserted after your manuscript is accepted if  
required according to the journal that you are submitting your paper to)**

CORRESPONDING AUTHOR FOOTNOTE: \* To whom correspondence should be  
addressed. E-mail: [rkmetre@iitj.ac.in](mailto:rkmetre@iitj.ac.in) Phone (*Office*): (+91) 291-280-1309.

## Table of Contents

|                                                                                                                      |         |
|----------------------------------------------------------------------------------------------------------------------|---------|
| Crystal data and structure refinement for <b>1</b> and <b>2</b> .....                                                | S3      |
| IR spectrum of L1H, <b>1</b> and <b>2</b> .....                                                                      | S4      |
| HRMS analysis for L1H, <b>1</b> and <b>2</b> .....                                                                   | S4-S5   |
| Elemental analysis of <b>1</b> and <b>2</b> .....                                                                    | S6      |
| XPS-analysis for the Fe 2p binding energies of complexes <b>1</b> and <b>2</b> .....                                 | S7      |
| Thermogravimetric analysis of <b>1</b> and <b>2</b> .....                                                            | S7      |
| <sup>1</sup> H and <sup>13</sup> C{ <sup>1</sup> H} NMR spectra of L1H .....                                         | S8      |
| <sup>1</sup> H and <sup>13</sup> C{ <sup>1</sup> H} NMR spectra of Complex <b>1</b> .....                            | S9      |
| <sup>1</sup> H and <sup>13</sup> C{ <sup>1</sup> H} NMR spectra of Complex <b>2</b> .....                            | S10     |
| Cyclic voltammograms of complex L1H and L2H.....                                                                     | S11     |
| Fuel performance tests of bare GC, L1H and L2H.....                                                                  | S11-S12 |
| UV-vis spectra of complex <b>1</b> and <b>2</b> after running the H <sub>2</sub> O <sub>2</sub> fuel cell test. .... | S12     |
| Electrocatalytic reduction of H <sub>2</sub> O <sub>2</sub> in different acidic electrolytes .....                   | S13     |
| Fuel performance tests in different acidic electrolytes .....                                                        | S14-S15 |
| Fuel performance tests in the presence of phosphate ions .....                                                       | S16     |
| Computational study and DFT computed absorption spectra of Complex <b>1</b> .....                                    | S17-S19 |

**Table S1. Crystal data and structure refinement for 1 and 2 (CCDC 2376420-2376421).**

| Identification code                                 | 1                                                                                | 2                                                                                               |
|-----------------------------------------------------|----------------------------------------------------------------------------------|-------------------------------------------------------------------------------------------------|
| <b>Empirical formula</b>                            | C <sub>61</sub> H <sub>38</sub> Cl <sub>2</sub> FeN <sub>10</sub> S <sub>2</sub> | C <sub>54</sub> H <sub>34</sub> Cl <sub>2</sub> FeN <sub>10</sub> O <sub>2</sub> S <sub>2</sub> |
| <b>Formula weight</b>                               | 1101.88                                                                          | 1045.78                                                                                         |
| <b>Temperature/K</b>                                | 98(2)                                                                            | 98(2)                                                                                           |
| <b>Crystal system</b>                               | Triclinic                                                                        | monoclinic                                                                                      |
| <b>Space group</b>                                  | P-1                                                                              | P2 <sub>1</sub> /n                                                                              |
| <b>a (Å)</b>                                        | 12.155(3)                                                                        | 11.2395(4)                                                                                      |
| <b>b (Å)</b>                                        | 14.292(3)                                                                        | 31.2736(10)                                                                                     |
| <b>c (Å)</b>                                        | 16.758(4)                                                                        | 13.8511(5)                                                                                      |
| <b>α (°)</b>                                        | 114.981(5)                                                                       | 90                                                                                              |
| <b>β (°)</b>                                        | 97.046(6)                                                                        | 111.7710(10)                                                                                    |
| <b>γ (°)</b>                                        | 101.320(6)                                                                       | 90                                                                                              |
| <b>Volume (Å<sup>3</sup>)</b>                       | 2517.5(9)                                                                        | 4521.4(3)                                                                                       |
| <b>Z</b>                                            | 2                                                                                | 4                                                                                               |
| <b>ρ<sub>calc</sub>, g.cm<sup>-3</sup></b>          | 1.454                                                                            | 1.536                                                                                           |
| <b>μ (mm<sup>-1</sup>)</b>                          | 0.543                                                                            | 0.603                                                                                           |
| <b>F(000)</b>                                       | 1132.0                                                                           | 2144.0                                                                                          |
| <b>Radiation</b>                                    | MoK <sub>α</sub> (λ = 0.71073)                                                   | MoK <sub>α</sub> (λ = 0.71073)                                                                  |
| <b>2θ range for data collection (°)</b>             | 5.3 to 56.746                                                                    | 4.782 to 56.72                                                                                  |
| <b>Index ranges</b>                                 | -16 ≤ h ≤ 16, -19 ≤ k ≤ 19,<br>-22 ≤ l ≤ 22                                      | -14 ≤ h ≤ 15, -41 ≤ k ≤ 41,<br>-18 ≤ l ≤ 18                                                     |
| <b>Reflections collected</b>                        | 39556                                                                            | 73504                                                                                           |
| <b>Independent reflections</b>                      | 12571 [R <sub>int</sub> = 0.0454, R <sub>sigma</sub> =<br>0.0487]                | 11259 [R <sub>int</sub> = 0.0576, R <sub>sigma</sub> =<br>0.0383]                               |
| <b>Data/restraints/parameters</b>                   | 12571/0/685                                                                      | 11259/0/640                                                                                     |
| <b>Goodness-of-fit on F<sup>2</sup></b>             | 1.037                                                                            | 1.040                                                                                           |
| <b>Final R indexes [I ≥ 2σ (I)]</b>                 | R <sub>1</sub> = 0.0724, wR <sub>2</sub> = 0.2009                                | R <sub>1</sub> = 0.0401, wR <sub>2</sub> = 0.0864                                               |
| <b>Final R indexes [all data]</b>                   | R <sub>1</sub> = 0.0923, wR <sub>2</sub> = 0.2203                                | R <sub>1</sub> = 0.0566, wR <sub>2</sub> = 0.0964                                               |
| <b>Largest diff. peak/hole / (e Å<sup>-3</sup>)</b> | 1.17/-2.16                                                                       | 0.44/-0.52                                                                                      |

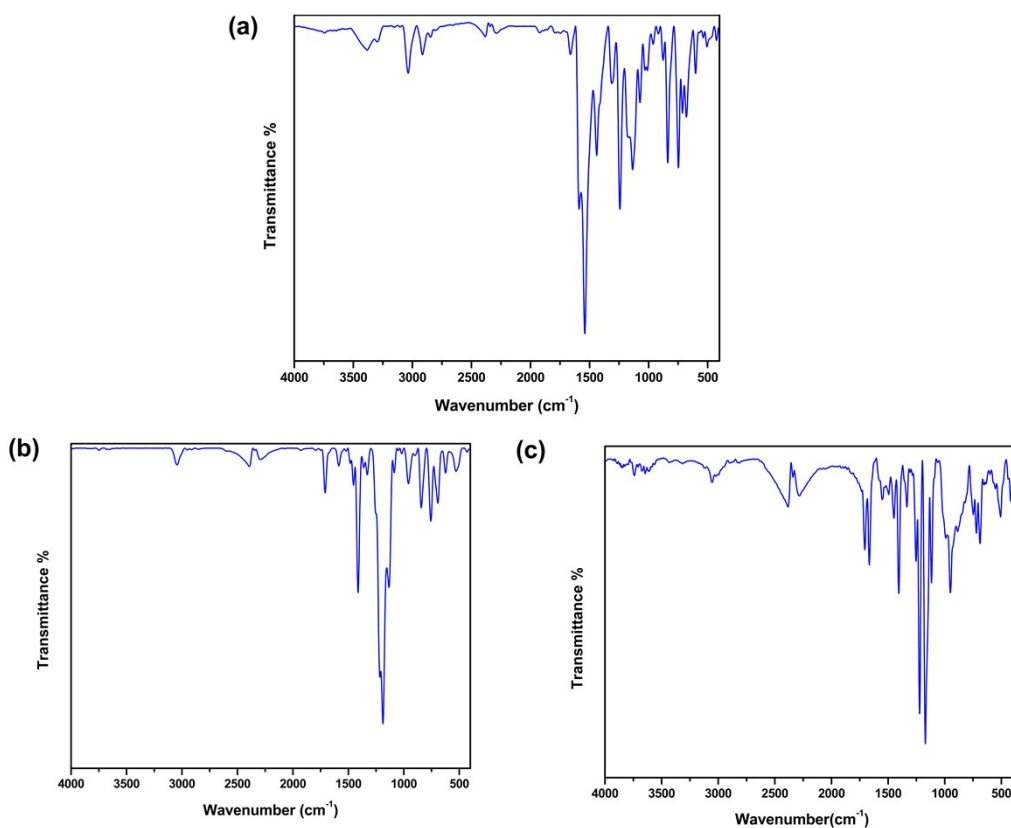

**Fig S1.** IR spectrum of (a) L1H (b) Complex 1 (c) Complex 2.

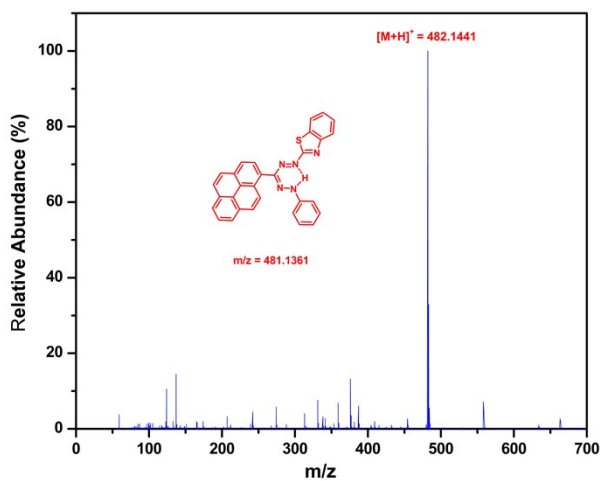

**Figure S2.** HRMS analysis for L1H: Anal. Calcd. for  $[M+H]^+$  peak,  $m/z = 482.1361$ . Found  $[M+H]^+$  peak,  $m/z = 482.1441$ .

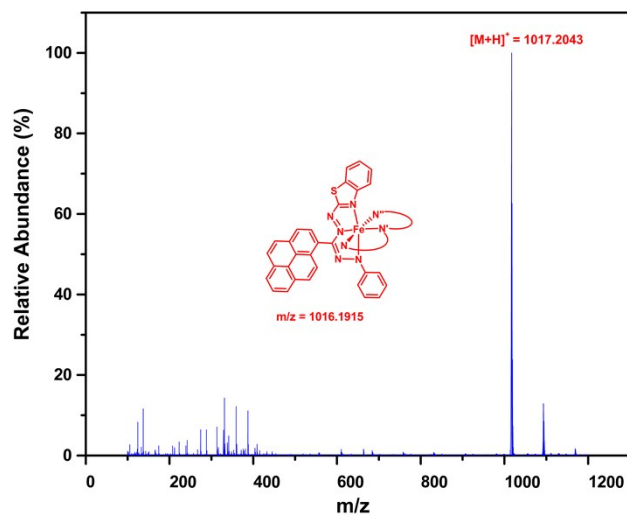

**Figure S3.** HRMS analysis for **1**: Anal. Calcd. for  $[M+H]^+$  peak,  $m/z = 1017.1915$ . Found  $[M+H]^+$  peak,  $m/z = 1017.2043$ .

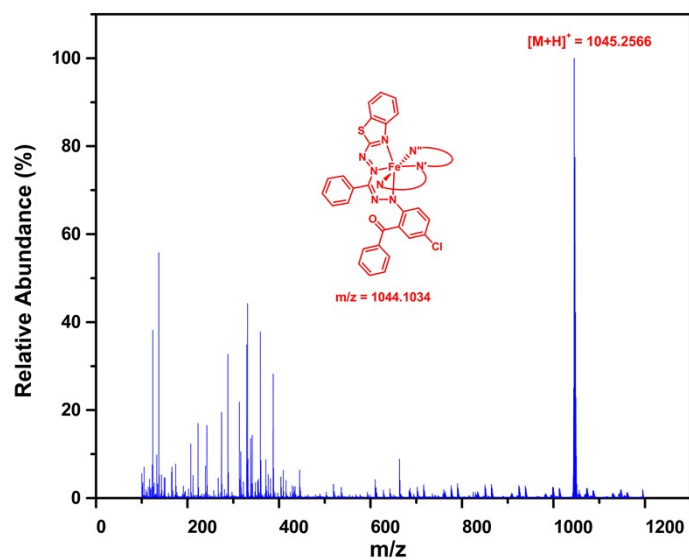

**Figure S4.** HRMS analysis for **2**: Anal. Calcd. for  $[M+H]^+$  peak,  $m/z = 1045.1034$ . Found  $[M+H]^+$  peak,  $m/z = 1045.2566$ .

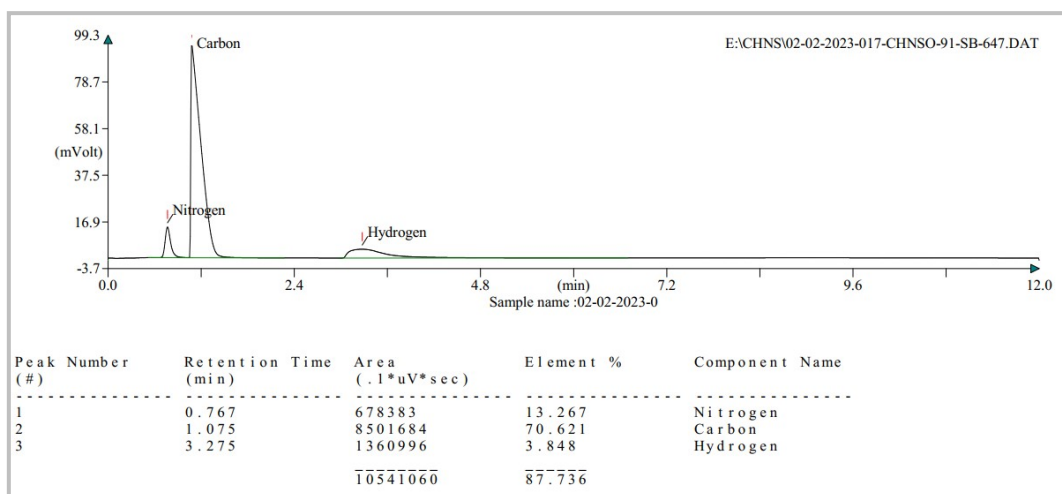

**Figure S5.** Elemental analysis of **1**. Anal. Calcd. (%) for  $C_{60}H_{36}FeN_{10}S_2$ : C, 70.86; H, 3.57; N, 13.77. Found: C, 70.62; H, 3.84; N, 13.26.

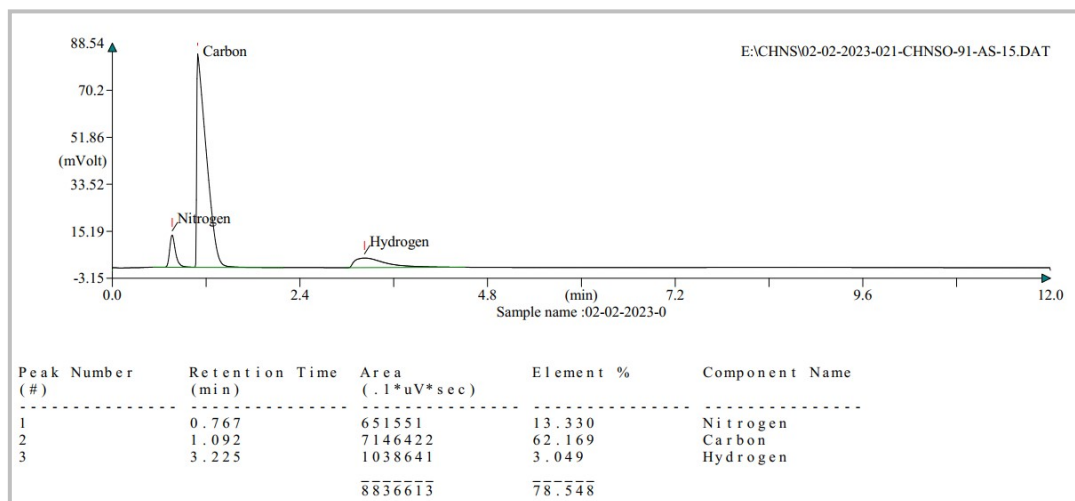

**Figure S6.** Elemental analysis of **2**. Anal. Calcd. (%) for  $C_{54}H_{34}Cl_2FeN_{10}O_2S_2$ : C, 62.02; H, 3.28; N, 13.39. Found: C, 62.169; H, 3.049; N, 13.330.

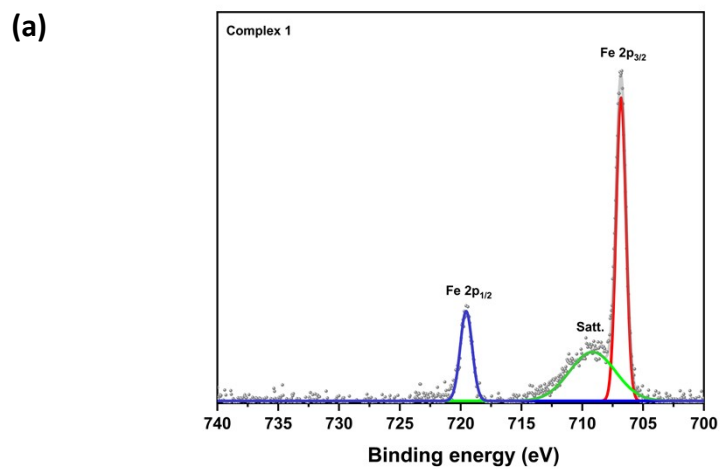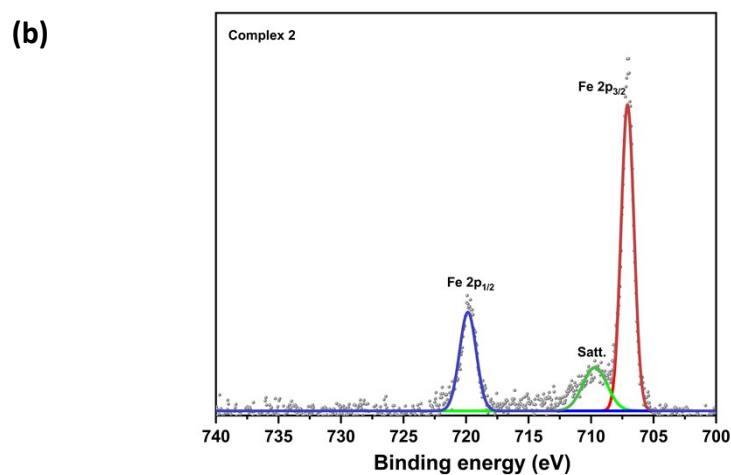

**Figure S7.** XPS-analysis for the Fe 2p binding energies of complexes (a) **1** and (b) **2**.

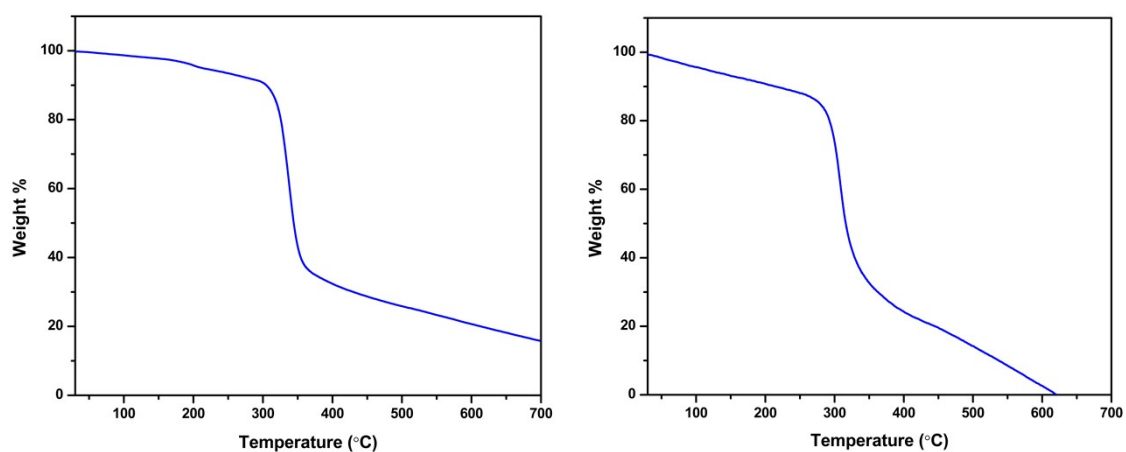

**Figure S8.** Thermogravimetric analysis of (left) complex **1**, (right) complex **2**.

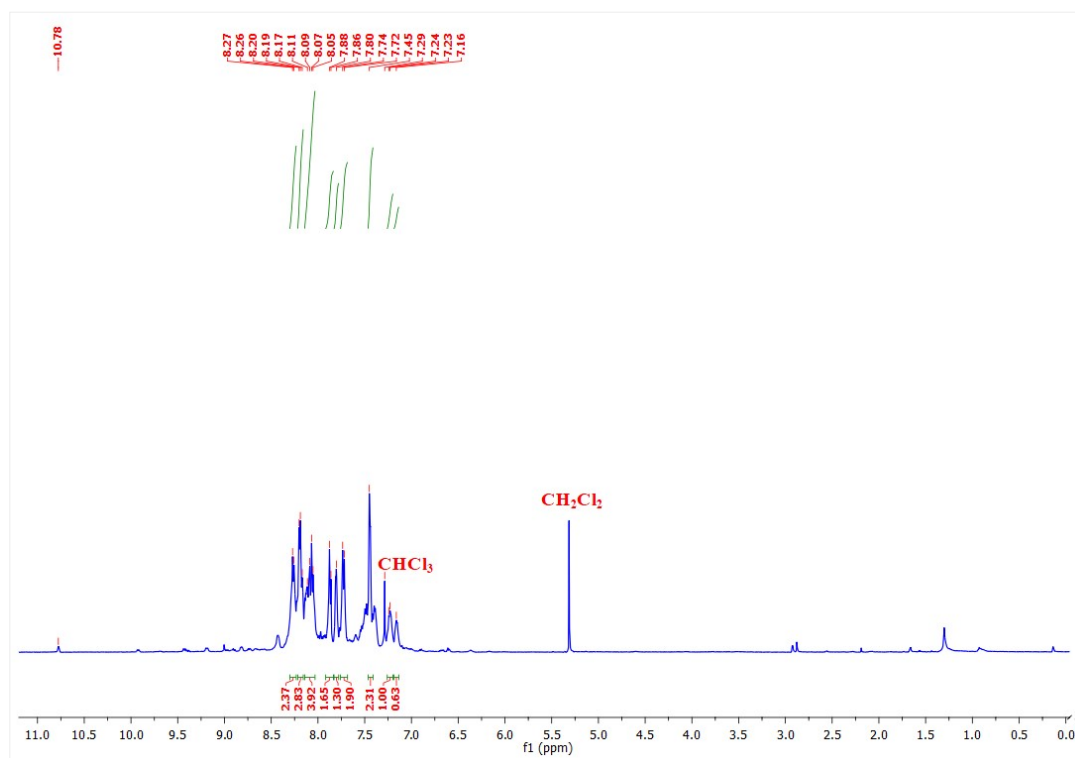

Figure S9.  $^1\text{H}$  NMR of L1H in  $\text{CDCl}_3$ .

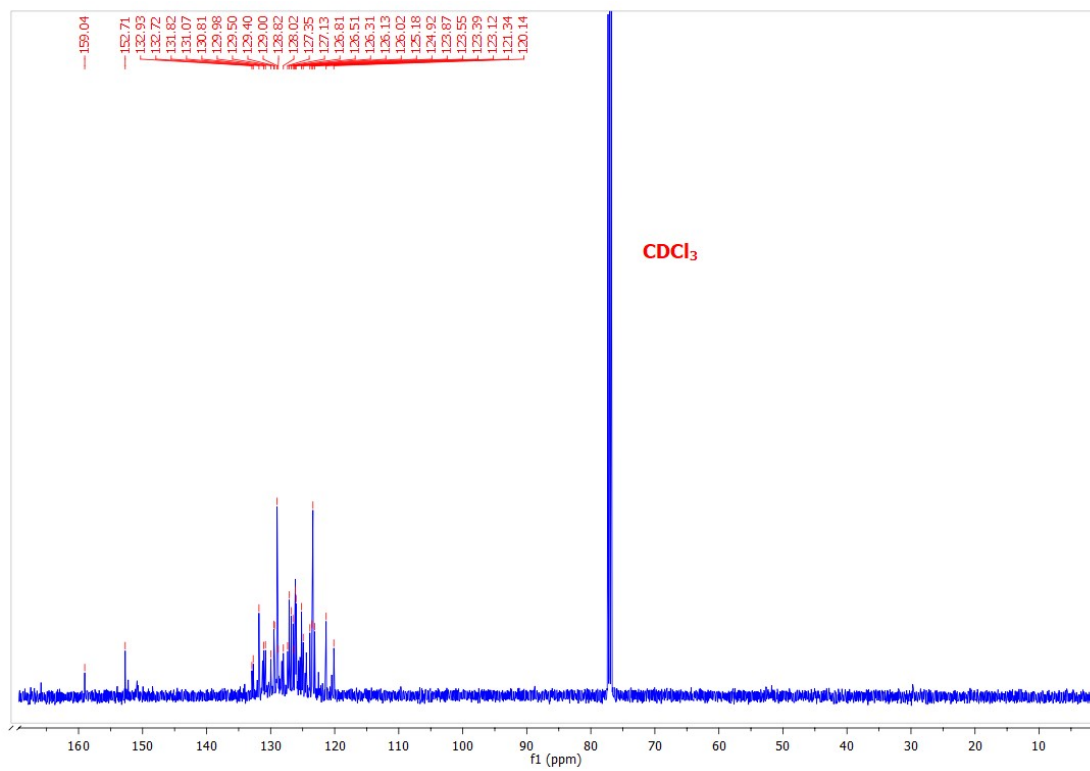



**Figure S10.**  $^{13}\text{C}\{^1\text{H}\}$  NMR of L1H in  $\text{CDCl}_3$ .

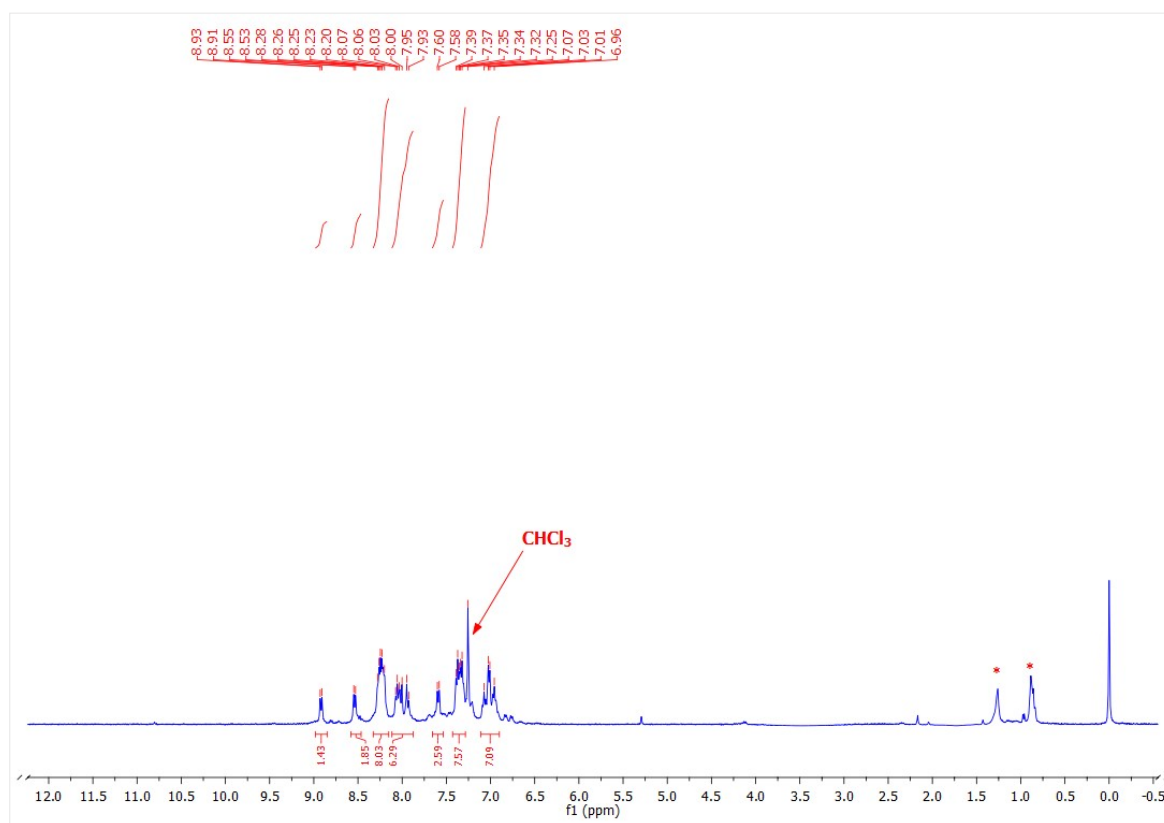

**Figure S11.**  $^1\text{H}$  NMR of Complex 1 in  $\text{CDCl}_3$ .

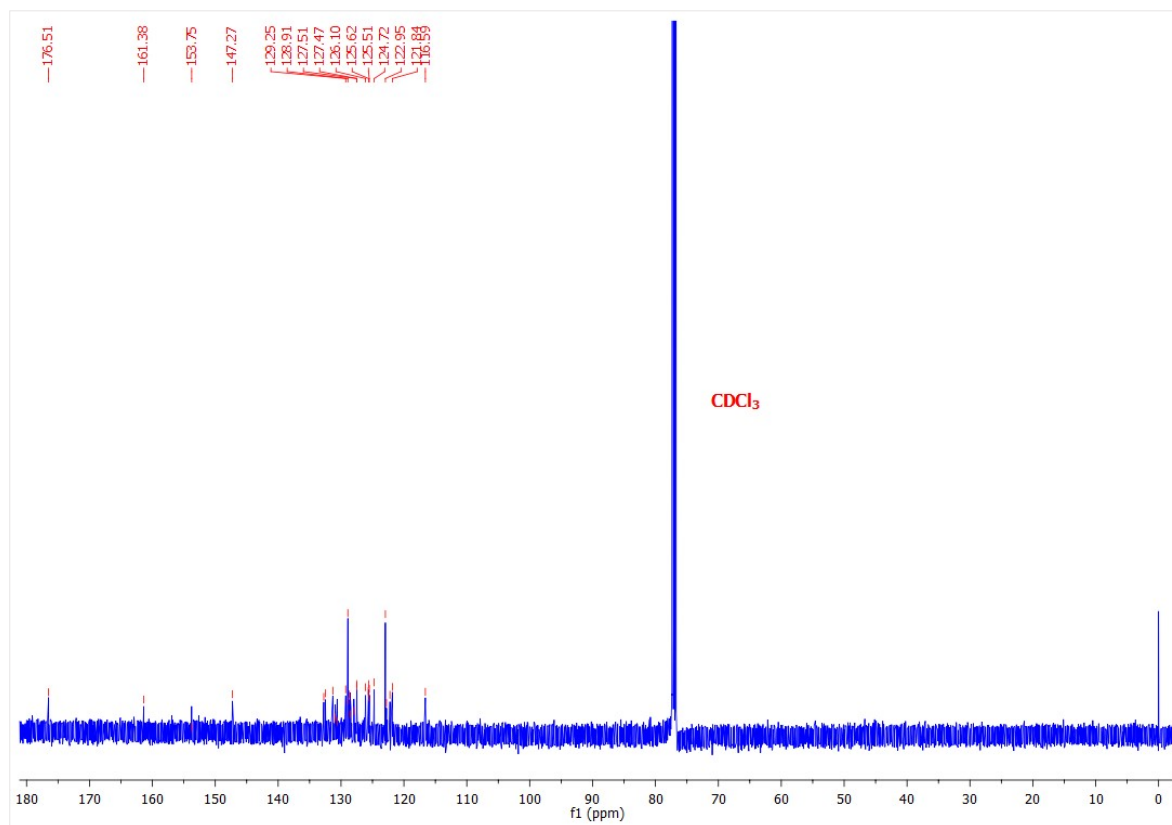

**Figure S12.**  $^{13}\text{C}\{^1\text{H}\}$  NMR of complex 1 in  $\text{CDCl}_3$ .

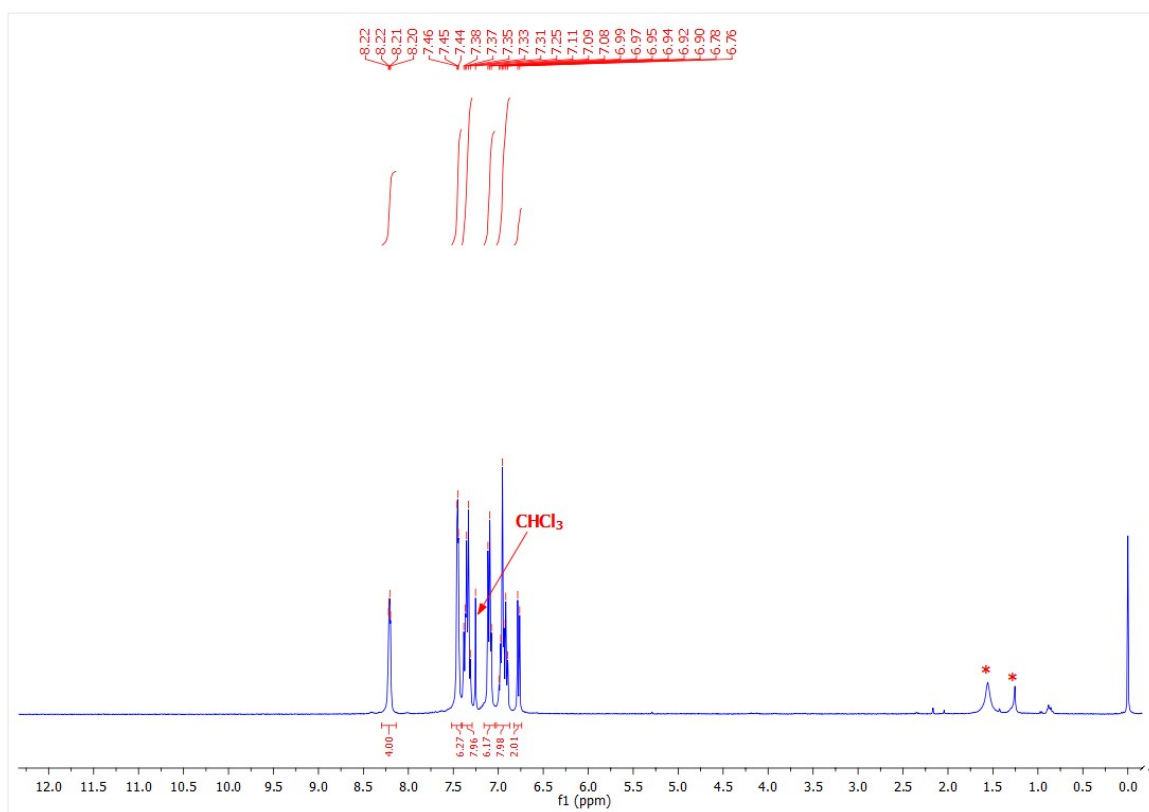

**Figure S13.**  $^1\text{H}$  NMR of Complex **2** in  $\text{CDCl}_3$ .

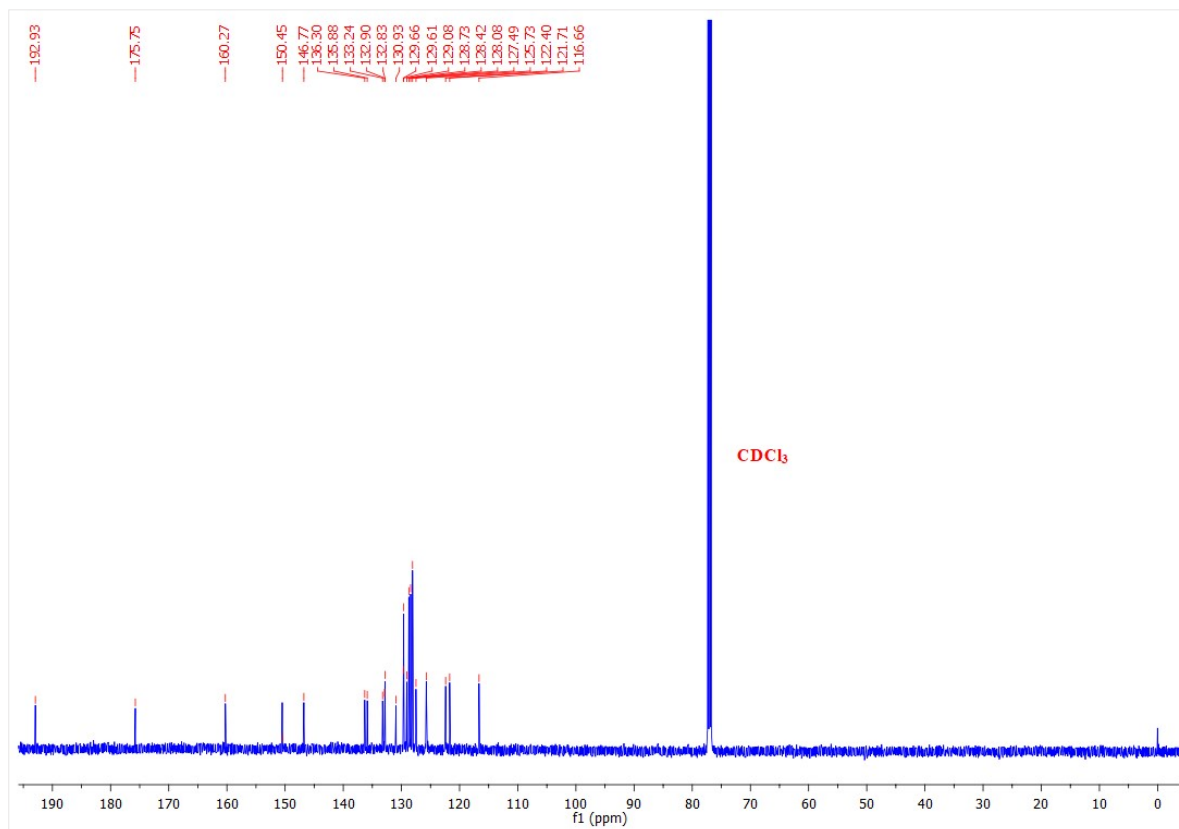

**Figure S14.**  $^{13}\text{C}\{^1\text{H}\}$  NMR of complex **2** in  $\text{CDCl}_3$ .

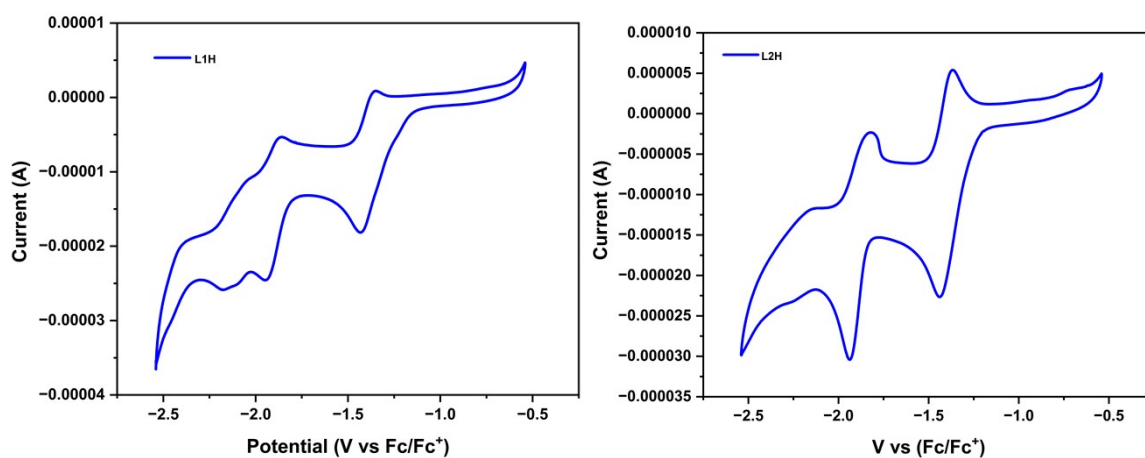

**Figure S15.** Cyclic voltammograms of complex (left) **L1H** and (right) **L2H** (1.5 mM solution of ligands in DMF; 0.1 M  $[\text{Bu}_4\text{N}][\text{PF}_6]$  electrolyte; scan rate =  $10 \text{ mV} \cdot \text{s}^{-1}$ ) acquired using a Pt working electrode, Pt-wire counter electrode, and Ag/AgCl (3.0 M KCl) reference electrode.

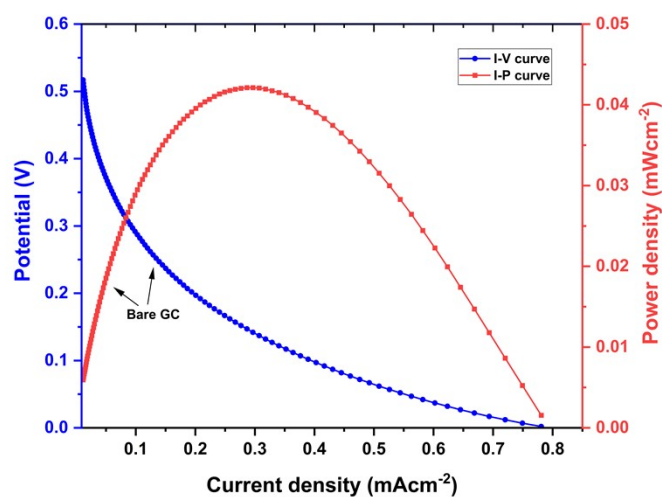

**Figure S16.** I–V (blue) and I–P (red) curves of a one-compartment  $\text{H}_2\text{O}_2$  fuel cell with Ni anode and bare GC in 0.1 M HCl. Performance tests were conducted using 500 mM  $\text{H}_2\text{O}_2$  with scan rate of  $10 \text{ mV} \cdot \text{s}^{-1}$ . Currents and powers were normalized by the geometric surface area of an electrode.

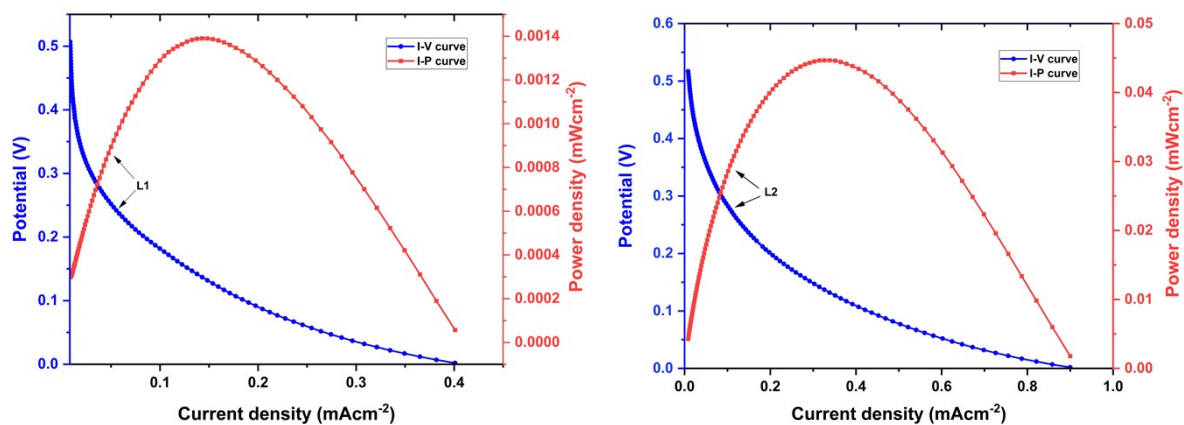

**Figure S17.** I–V (blue) and I–P (red) curves of a one-compartment  $\text{H}_2\text{O}_2$  fuel cell with Ni anode and GC modified with (left) L1H and (right) L2H in 0.1 M HCl. Performance tests were conducted using 500 mM  $\text{H}_2\text{O}_2$  with a scan rate of  $10\text{mV s}^{-1}$ . Currents and powers were normalized by the geometric surface area of an electrode.

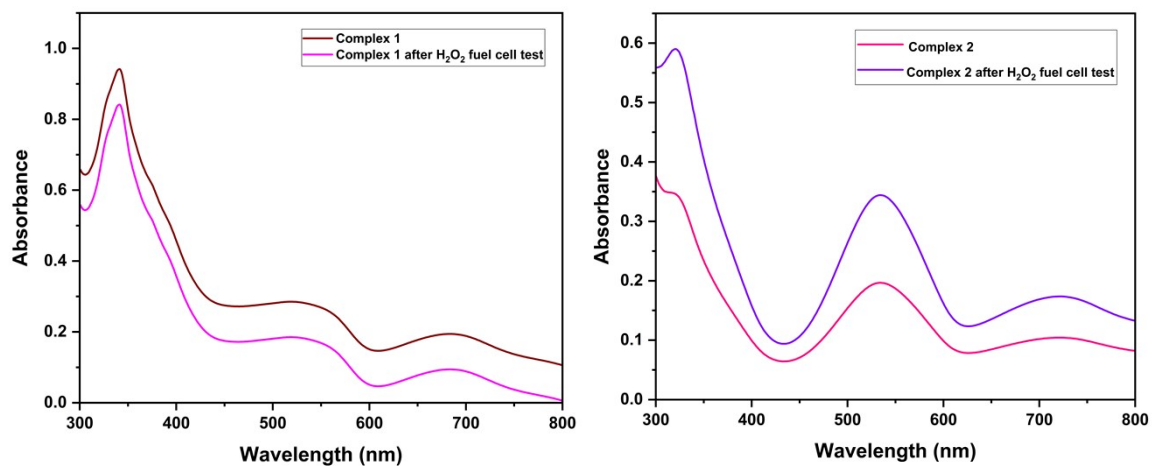

**Figure S18.** UV-vis spectra of (left) complex 1 and (right) complex 2 (blue line) and the recovered catalysts from the modified GC after running the  $\text{H}_2\text{O}_2$  fuel cell test.

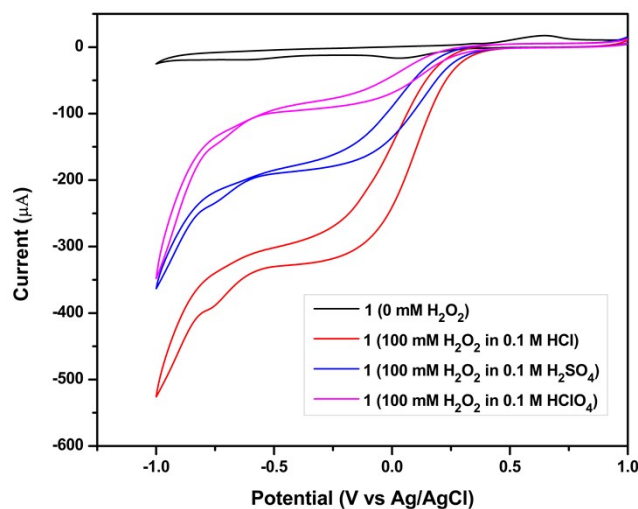

**Figure S19.** CV of  $\text{H}_2\text{O}_2$  with **1** modified electrode in 0.1 M HCl (red line), 0.1 M  $\text{H}_2\text{SO}_4$  (blue line) and 0.1M  $\text{HClO}_4$  (pink line). CVs using modified Glassy Carbon electrode as working electrode in absence (black line) of  $\text{H}_2\text{O}_2$  in acetate buffer (pH= 3) are also shown for reference. Ag/AgCl as reference and Pt-wire as counter electrode are used at a scan rate  $50\text{mV s}^{-1}$ .

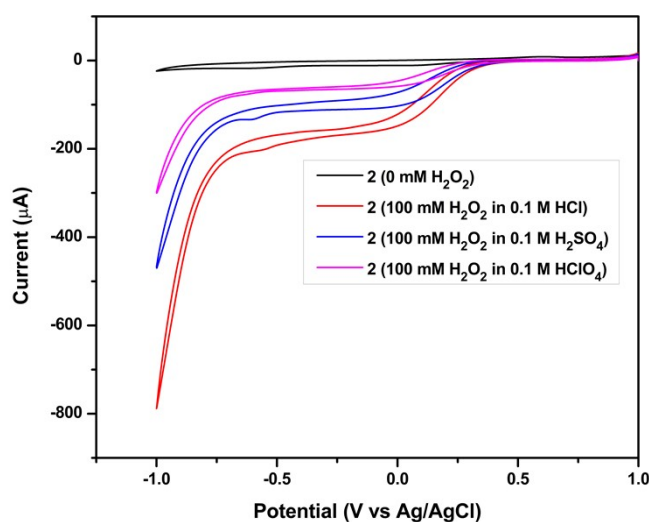

**Figure S20.** CV of  $\text{H}_2\text{O}_2$  with **2** modified electrode in 0.1 M HCl (red line), 0.1 M  $\text{H}_2\text{SO}_4$  (blue line) and 0.1M  $\text{HClO}_4$  (pink line). CVs using modified Glassy Carbon electrode as working electrode in absence (black line) of  $\text{H}_2\text{O}_2$  in acetate buffer (pH= 3) are also shown for reference. Ag/AgCl as reference and Pt-wire as counter electrode are used at a scan rate  $50\text{mV s}^{-1}$ .

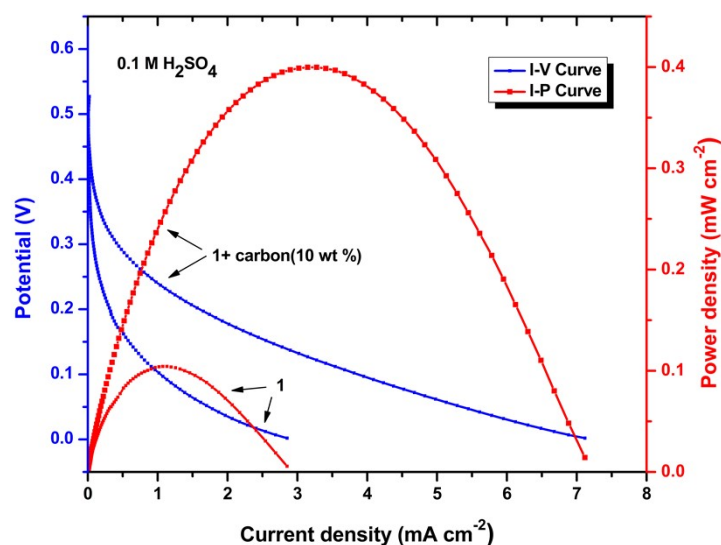

**Figure S21.** I–V (blue) and I–P (red) curves of a one-compartment  $\text{H}_2\text{O}_2$  fuel cell with Ni anode and GC modified with **1** in 0.1 M  $\text{H}_2\text{SO}_4$ . Performance tests were conducted using 500 mM  $\text{H}_2\text{O}_2$  with scan rate of  $10\text{mV s}^{-1}$ . Currents and powers were normalized by the geometric surface area of an electrode.

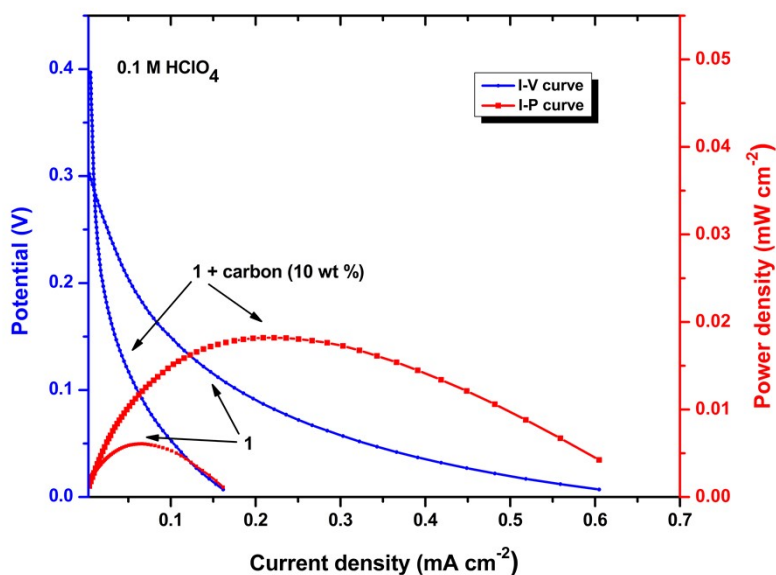

**Figure S22.** I–V (blue) and I–P (red) curves of a one-compartment  $\text{H}_2\text{O}_2$  fuel cell with Ni anode and GC modified with **1** in 0.1 M  $\text{HClO}_4$ . Performance tests were conducted using 500 mM  $\text{H}_2\text{O}_2$  with scan rate of  $10\text{mV s}^{-1}$ . Currents and powers were normalized by the geometric surface area of an electrode.

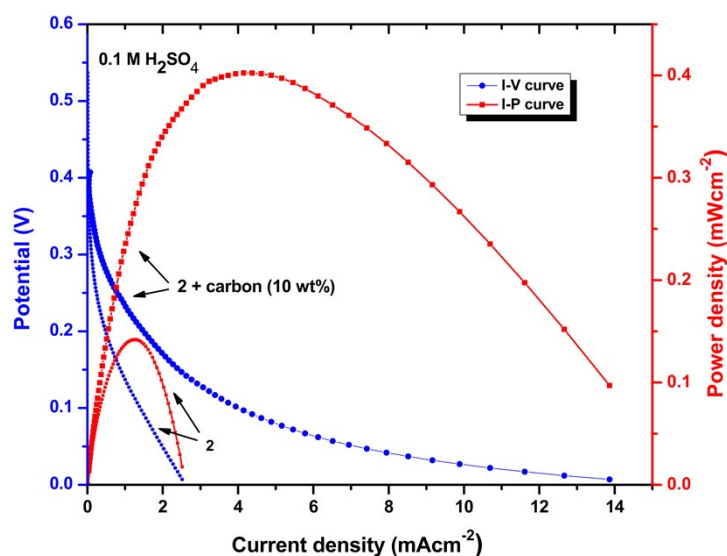

**Figure S23.** I–V (blue) and I–P (red) curves of a one-compartment  $\text{H}_2\text{O}_2$  fuel cell with Ni anode and GC modified with **2** in 0.1 M  $\text{H}_2\text{SO}_4$ . Performance tests were conducted using 500 mM  $\text{H}_2\text{O}_2$  with scan rate of  $10\text{mV s}^{-1}$ . Currents and powers were normalized by the geometric surface area of an electrode.

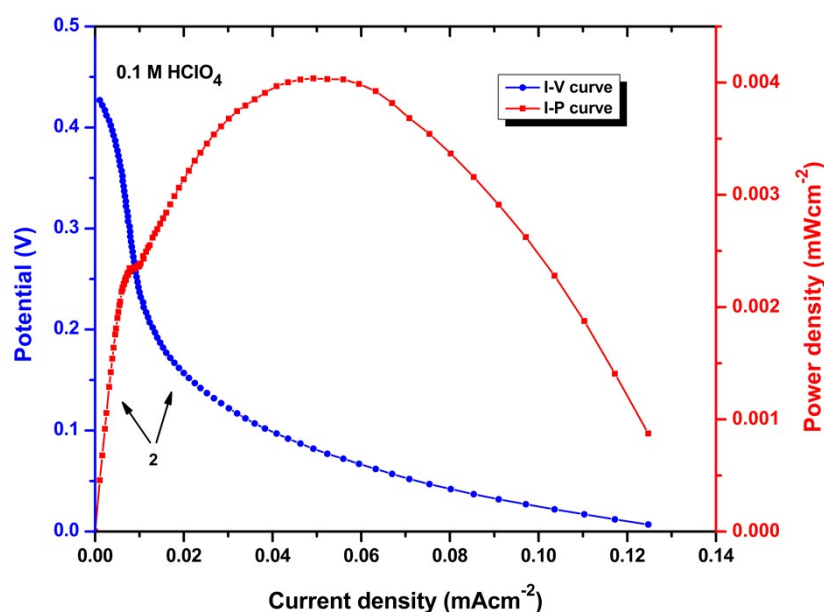

**Figure S24.** I–V (blue) and I–P (red) curves of a one-compartment  $\text{H}_2\text{O}_2$  fuel cell with Ni anode and GC modified with **2** in 0.1 M  $\text{HClO}_4$ . Performance tests were conducted using 500 mM  $\text{H}_2\text{O}_2$  with scan rate of  $10\text{mV s}^{-1}$ . Currents and powers were normalized by the geometric surface area of an electrode.

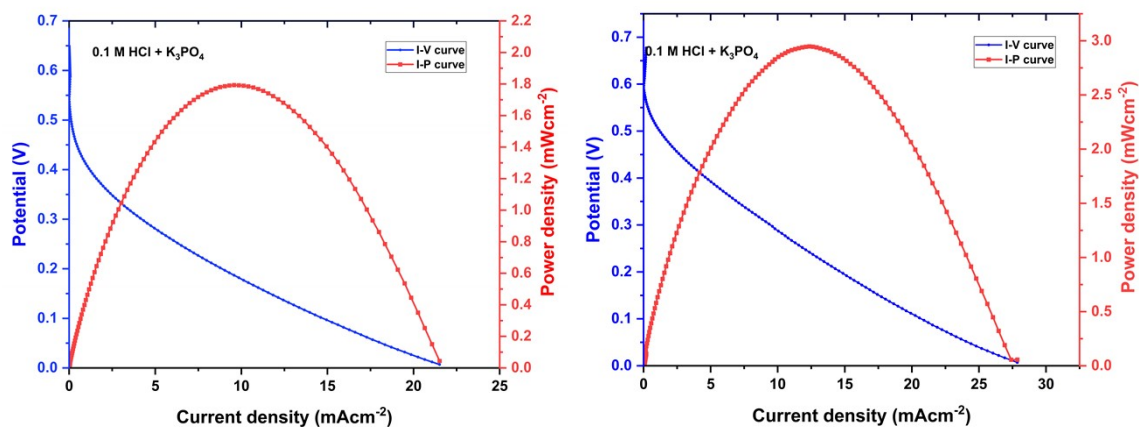

**Figure S25.** (Left) I–V (blue) and I–P (red) curves of a one-compartment  $\text{H}_2\text{O}_2$  fuel cell with Ni anode and GC modified with **1** + 10 wt% C in 0.1 M HCl +  $\text{K}_3\text{PO}_4$ . (Right) I–V (blue) and I–P (red) curves of a one-compartment  $\text{H}_2\text{O}_2$  fuel cell with Ni anode and GC modified with **2** + 10 wt% C in 0.1 M HCl +  $\text{K}_3\text{PO}_4$ .

**Table S2:** Comparison between the X-ray determined and DFT obtained a few selective geometric parameters of complex **1**.

| S. no          | X-Ray         | DFT           |               |
|----------------|---------------|---------------|---------------|
|                |               | B3LYP         | BP86          |
| Fe-N (S)       | 1.996/1.991   | 2.017/2.015   | 1.994/1.989   |
| Fe-N(Bz)       | 1.933/1.942   | 1.974/1.978   | 1.935/1.939   |
| Fe-N(Py)       | 1.884/1.884   | 1.898/1.896   | 1.877/1.878   |
| N(S)-Fe-N(Bz)  | 156.24/157.01 | 157.55/157.21 | 158.03/157.57 |
| N(Py)-Fe-N(Py) | 177.73        | 177.83        | 177.38        |
| N=N(S)         | 1.351/1.360   | 1.329/1.330   | 1.347/1.344   |
| N=N(Bz)        | 1.308/1.305   | 1.283/1.281   | 1.302/1.305   |
| C-S-C          | 89.57/89.69   | 89.28/89.27   | 89.35/89.39   |



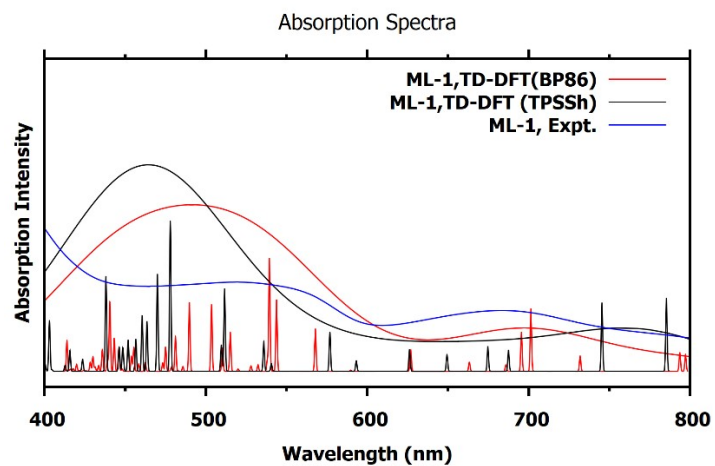

**Figure S26.** The computed absorption spectra obtained at unrestricted BP86 and TPSSh methods in conjugation with def2-TZVPP basis function. The spectrum obtained at BP86 method is found to be well accord with the experimental absorption spectra.

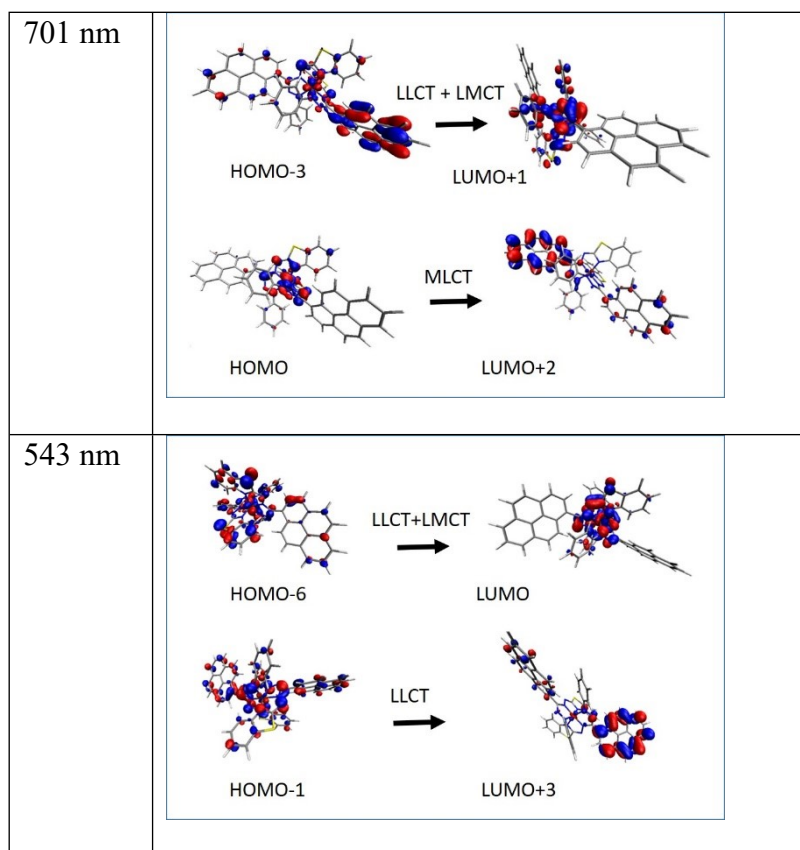

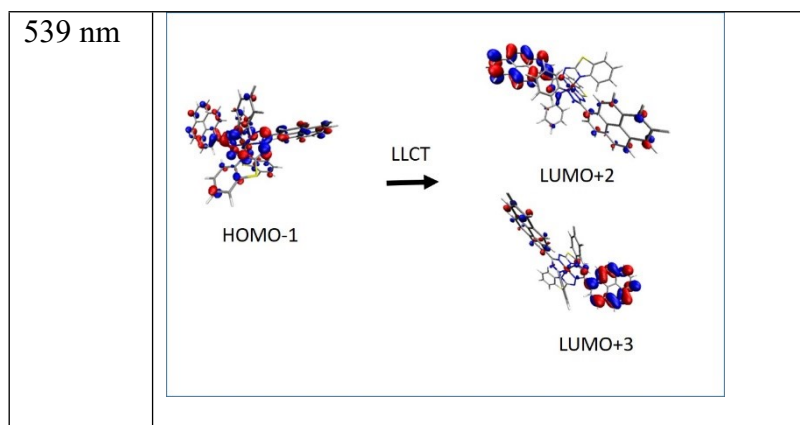

**Figure S27.** The molecular orbital representations of electronic transitions corresponding to the TD-DFT computed absorption spectrum of Complex 1 in  $\text{CHCl}_3$  solvent in the wavelength range of 530-700 nm. A contour value of 0.03 au is used to generate the plots.
